# Supplementary material
Source: Springer Nature journal article supplement (https://www.springermedizin.de/resource/supplementary/12955_2005_218_MOESM6_ESM.pdf/9559928)
Supplement: MOESM6 [file 9559928]

**Figure 5. Responsiveness: change over time in EAPIQ scales by change in eye allergies**

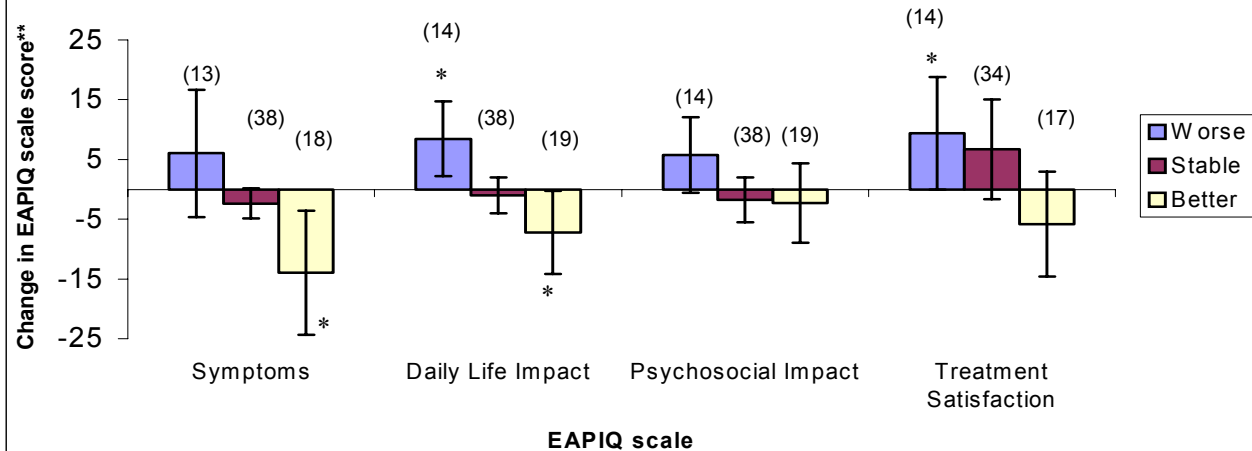

\*Paired t-tests found statistically significant change over time within groups ( $P < 0.05$ )

\*\*Mean change in EAPIQ scores with 95% Confidence Interval (n)
